# Supplementary material for: A robust method for automatic identification of landmarks on surface models of the pelvis
Source: PubMed Central journal article supplement (PMC6746744; doi:10.1038/s41598-019-49573-4), 2019-09-16
Supplement: 41598_2019_49573_MOESM1_ESM.pdf [file 41598_2019_49573_MOESM1_ESM.pdf]

# A robust method for automatic identification of landmarks on surface models of the pelvis

## SUPPLEMENTARY TABLE S1 - LIST OF ABBREVIATIONS

Maximilian C. M. Fischer, Felix Krooß, Juliana Habor, Klaus Radermacher

Chair of Medical Engineering, Helmholtz-Institute for Biomedical Engineering, RWTH Aachen University, Germany

Supplementary Table S1. List of abbreviations. In the paper, an "s" at the end of the abbreviation indicates the plural form.

| <b>Landmarks</b>                       |                                                                                           |
|----------------------------------------|-------------------------------------------------------------------------------------------|
| AIIS                                   | anterior inferior iliac spine                                                             |
| ASIS                                   | anterior superior iliac spine                                                             |
| IIT                                    | iliac ischial tuberosity                                                                  |
| IPY                                    | iliac pubic symphysis                                                                     |
| IS                                     | ischial spine                                                                             |
| IT                                     | iliac tubercle                                                                            |
| PIIS                                   | posterior inferior iliac spine                                                            |
| PS                                     | pubic symphysis                                                                           |
| PSIS                                   | posterior superior iliac spine                                                            |
| PT                                     | pubic tubercle                                                                            |
| SP                                     | sacral promontory                                                                         |
| <b>Coordinate systems</b>              |                                                                                           |
| APP                                    | anterior pelvic plane                                                                     |
| CS                                     | coordinate system                                                                         |
| SISP                                   | superior inferior spine plane                                                             |
| TPCS                                   | temporary pelvic coordinate system                                                        |
| <b>Landmark identification methods</b> |                                                                                           |
| CM                                     | curvature method                                                                          |
| ITPM                                   | iterative tangential plane method                                                         |
| MM                                     | manual method                                                                             |
| <b>Error metrics</b>                   |                                                                                           |
| ITPMD                                  | median deviation between the landmarks determined by the MM and the reference landmarks   |
| MMD                                    | median deviation between the landmarks determined by the ITPM and the reference landmarks |
| <b>Others</b>                          |                                                                                           |
| CT                                     | computed tomography                                                                       |
| No of LMs                              | number of landmarks                                                                       |
| SICAS                                  | Swiss Institute for Computer Assisted Surgery                                             |
| SSM                                    | statistical shape model                                                                   |
