# Supplementary material for: A robust method for automatic identification of landmarks on surface models of the pelvis
Source: PubMed Central journal article supplement (PMC6746744; doi:10.1038/s41598-019-49573-4), 2019-09-16
Supplement: 41598_2019_49573_MOESM2_ESM.pdf [file 41598_2019_49573_MOESM2_ESM.pdf]

# A robust method for automatic identification of landmarks on surface models of the pelvis

SUPPLEMENTARY TABLE S2 – INFORMATION ON THE CADAVERIC SUBJECTS

Maximilian C. M. Fischer, Felix Krooß, Juliana Habor, Klaus Radermacher

Chair of Medical Engineering, Helmholtz-Institute for Biomedical Engineering, RWTH Aachen University, Germany

Supplementary Table S2. Used cadaveric subjects from the open source virtual skeleton database (VSDFullBody) hosted at [www.smir.ch](http://www.smir.ch).

|               |      |      |      |      |      |      |      |      |      |      |      |      |      |      |      |      |      |      |      |      |
|---------------|------|------|------|------|------|------|------|------|------|------|------|------|------|------|------|------|------|------|------|------|
| <b>Number</b> | z001 | z009 | z013 | z019 | z023 | z024 | z027 | z035 | z036 | z042 | z046 | z049 | z050 | z055 | z056 | z057 | z061 | z062 | z064 | z066 |
| <b>Age</b>    | 76   | 25   | 41   | 58   | 47   | 57   | 37   | 30   | 62   | 61   | 38   | 34   | 84   | 73   | 26   | 75   | 39   | 43   | 69   | 48   |
| <b>Gender</b> | M    | M    | F    | M    | F    | F    | F    | F    | M    | F    | M    | M    | M    | M    | M    | M    | F    | M    | M    | M    |
