# Supplementary material for: A robust method for automatic identification of landmarks on surface models of the pelvis
Source: PubMed Central journal article supplement (PMC6746744; doi:10.1038/s41598-019-49573-4), 2019-09-16
Supplement: 41598_2019_49573_MOESM3_ESM.pdf [file 41598_2019_49573_MOESM3_ESM.pdf]

# A robust method for automatic identification of landmarks on surface models of the pelvis

SUPPLEMENTARY FIGURES S3 – DEVIATIONS OF LANDMARKS AND COORDINATE SYSTEMS

Maximilian C. M. Fischer, Felix Krooß, Juliana Habor, Klaus Radermacher

Chair of Medical Engineering, Helmholtz-Institute for Biomedical Engineering, RWTH Aachen University, Germany

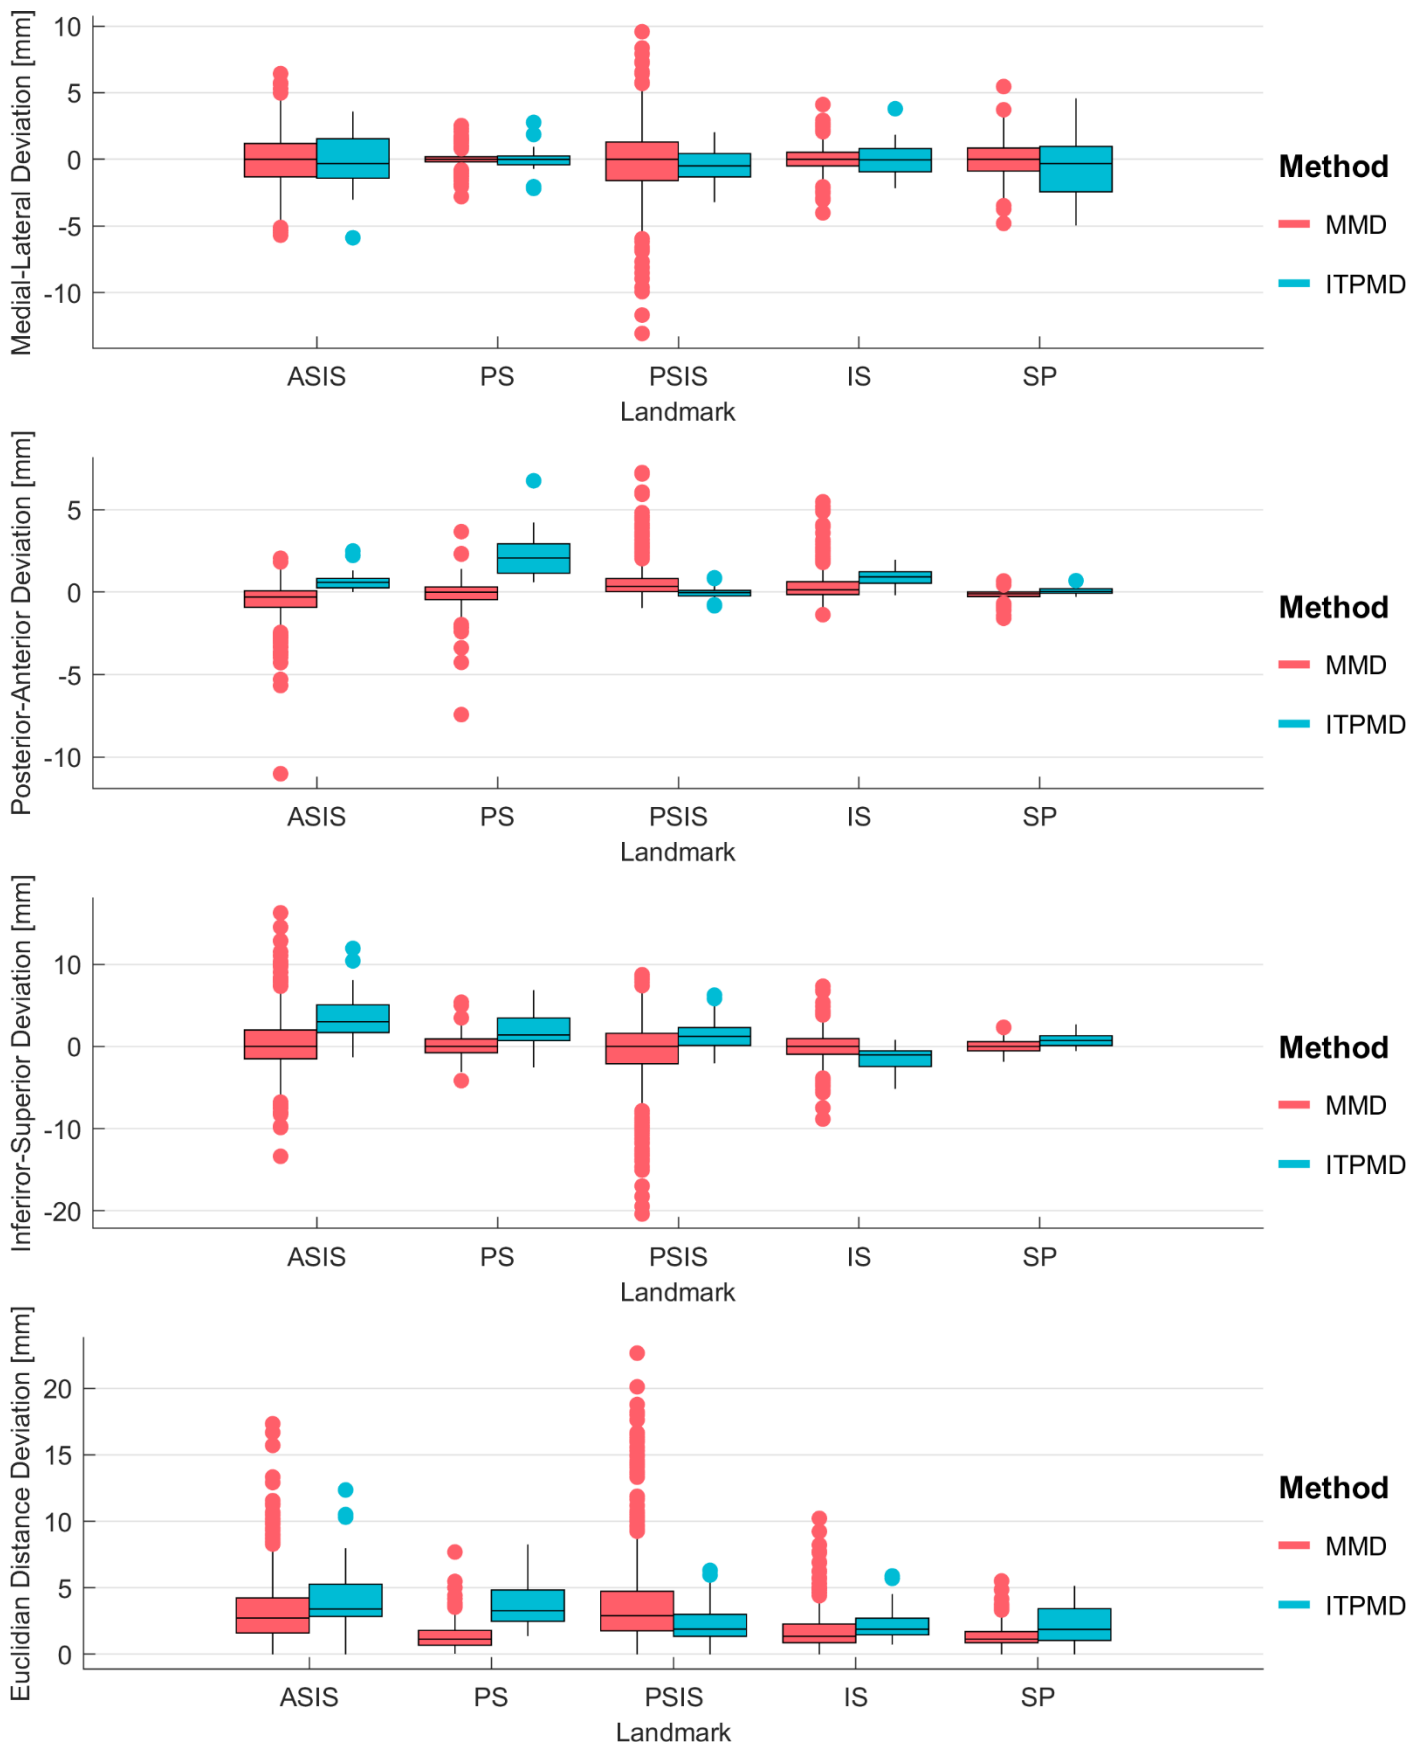

**Supplementary Figure S3.1. Deviations of the landmarks.** Manual method's deviation (MMD) (n = 400), ITP method's deviation (ITPMD) (n = 20).

Box plot of Table 3 in the paper.

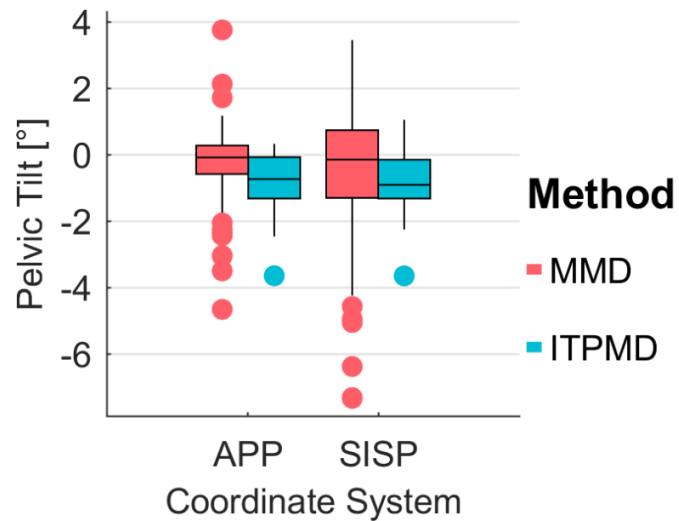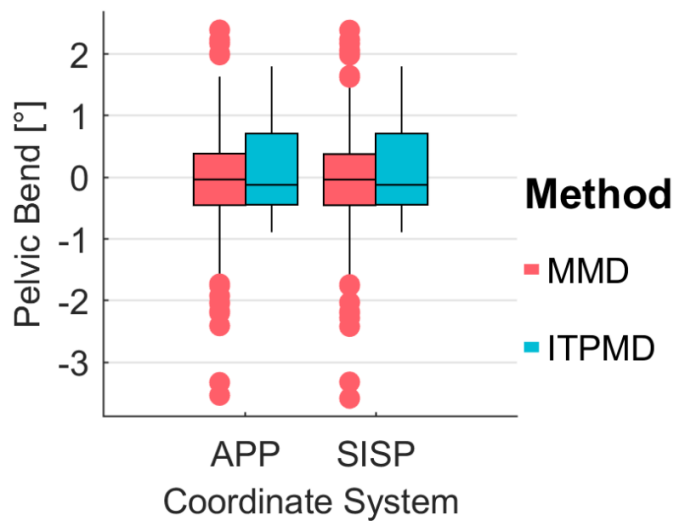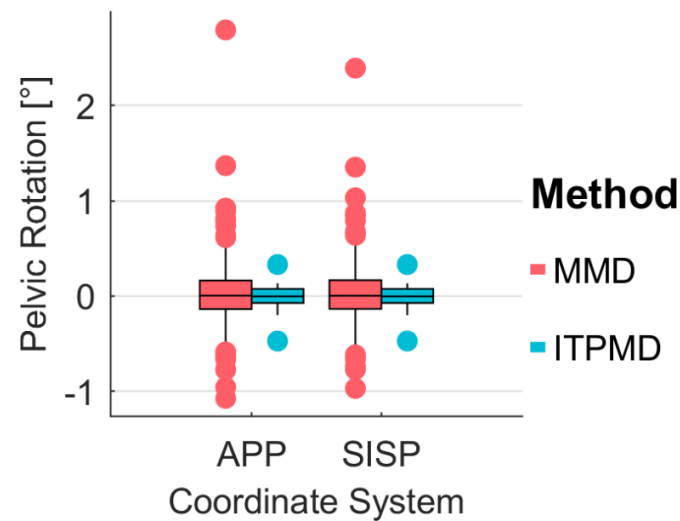

Supplementary Figure S3.2. Deviations of the coordinate systems. Manual method's deviation (MMD) (n = 400), ITP method's deviation (ITPMD) (n = 20). Box plot of Table 4 in the paper.
